1 **Running head: Detection of anther dehiscence by deep learning**

2

3 **Corresponding author:** Ling Min, National Key Laboratory of Crop Genetic

4 Improvement, Huazhong Agricultural University, Wuhan, Hubei 430070, China

5 Telephone number: +86-2787283955

6 Fax number: +86-2787280196

7 **E-mail:** [lingmin@mail.hzau.edu.cn](mailto:lingmin@mail.hzau.edu.cn)

8

9 **Research area:** Breakthrough Technologies, Tools, and Resources

10

11

12

13

14

15

16

17

18

19

20

21

22

23

24

25 **Fast anther dehiscence state recognition system establishing by deep learning to**  
26 **screen heat tolerant cotton**

27

28 Zhihao Tan<sup>1,#</sup>, Jiawei Shi<sup>1,#</sup>, Rongjie Lv<sup>1,#</sup>, Qingyuan Li<sup>2</sup>, Jing Yang<sup>3</sup>, Yizan Ma<sup>1</sup>,  
29 Yanlong Li<sup>1</sup>, Yuanlong Wu<sup>1</sup>, Rui Zhang<sup>1</sup>, Huanhuan Ma<sup>1</sup>, Yawei Li<sup>1</sup>, Li Zhu<sup>1</sup>, Jie  
30 Kong<sup>3</sup>, Xianlong Zhang<sup>1,&</sup>, Wanneng Yang<sup>1,&</sup>, and Ling Min<sup>1,\*</sup>

31

32 **Address**

33 <sup>1</sup> National Key Laboratory of Crop Genetic Improvement, Huazhong Agricultural  
34 University, Wuhan, Hubei 430070, China

35 <sup>2</sup> Forestry and Fruit Tree Research Institute, Wuhan Academy of Agricultural Sciences,  
36 Wuhan 430075, China

37 <sup>3</sup> Institute of Economic Crops, Xinjiang Academy of Agricultural Sciences, Xinjiang  
38 830091, China

39 <sup>#</sup> These authors contributed equally

40 <sup>&</sup> Senior authors

41 <sup>\*</sup> Corresponding authors

42

43 One sentence summary: The deep learning technique was applied to identify the  
44 anther dehiscence state for the first time to quickly screen heat tolerant cotton  
45 varieties and help to explore key genetic improvement genes.

46

47

48

49

50

51

52

53

54 **Footnotes:**

55 **Author contributions:** Z.T. and R.L. carried out the experiment with J.S. using the  
56 Faster R-CNN and YOLOv5, Z.T., R.L., and L.M. wrote the main manuscript text, and  
57 H.M., L.Z., Y.L., J.Y., Y.W., Y.M., R.Z., and Q.L. obtained and labeled the anther pictures,  
58 L.M., X.Z., W.Y., and J.K. designed and supervised the research, L.M., X.Z., and W.Y.  
59 revised the manuscript. L.M. agrees to serve as the author responsible for contact and  
60 ensures communication. All authors reviewed the manuscript.

61 **Funding information:** Project supported by the Fundamental Research Funds for the  
62 Central Universities (2021ZKPY019), the Open Funds of the National Key  
63 Laboratory of Crop Genetic Improvement, the Platform Construction of Genetic  
64 Improvement And Molecular Design Breeding For Xinjiang Island Cotton  
65 (2020172-2).

66 **Corresponding author:** Ling Min; [lingmin@mail.hzau.edu.cn](mailto:lingmin@mail.hzau.edu.cn)

67

68 **Keywords**

69 cotton anther, deep learning, Faster R-CNN, YOLOv5, model ensemble, high  
70 temperature stress

71

72

73

74

75

76

77

78

79

80

81

82

83

## 84 **Abstract**

85 Cotton is one of the most economically important crops in the world. The fertility of  
86 male reproductive organs is a key determinant of cotton yield. The anther dehiscence  
87 or indehiscence directly determine the probability of fertilization in cotton. Thus, the  
88 rapid and accurate identification of cotton anther dehiscence status is important for  
89 judging anther growth status and promoting genetic breeding research. The  
90 development of computer vision technology and the advent of big data have prompted  
91 the application of deep learning techniques to agricultural phenotype research.  
92 Therefore, two deep learning models (Faster R-CNN and YOLOv5) were proposed to  
93 detect the number and dehiscence status of anthers. The single-stage model based on  
94 YOLOv5 has higher recognition efficiency and the ability to deploy to the mobile end.  
95 Breeding researchers can apply this model to terminals to achieve a more intuitive  
96 understanding of cotton anther dehiscence status. Moreover, three improvement  
97 strategies of Faster R-CNN model were proposed, the improved model has higher  
98 detection accuracy than YOLOv5 model. In addition, the percentage of dehiscent  
99 anther of randomly selected 30 cotton varieties were observed from cotton population  
100 under normal temperature and high temperature (HT) conditions through the  
101 integrated Faster R-CNN model and manual observation. The result showed HT  
102 varying decreased the percentage of dehiscent anther in different cotton lines,  
103 consistent with the manual method. Thus, this system can help us to rapid and  
104 accurate identification of HT-tolerant cotton.

105

## 106 **Introduction**

107 Cotton is an economically important crop, and its reproductive development is  
108 susceptible to a variety of adverse stresses that affect its yield and quality. The  
109 reproductive organs of cotton include stamens and pistils, and stamens are more  
110 sensitive to heat stress than female organs (Peet et al., 1998). In many summer crops,  
111 reproductive organ abortion caused by high temperatures is manifested by normal  
112 development of the female reproductive system and abnormal development of the  
113 male reproductive system, failure to produce functional pollen or failure of the anthers

114 to achieve dehiscence properly to release pollen. Anther development is a complex  
115 process, going from sporogenic cells to anther dehiscence, and has been divided into  
116 14 periods by studying a variety of male sterile mutants (Sanders et al., 1999). Anther  
117 dehiscence, the final step in anther development, includes three processes: secondary  
118 thickening of the inner wall of the anther chamber, degradation of the septum cells,  
119 and dehiscence of the cleft which ultimately allow the release of pollen (Kim et al.,  
120 2010). Therefore, anther dehiscence is directly related to the probability of  
121 fertilization in cotton. If we can obtain phenotypic data on anther dehiscence quickly  
122 and accurately and conduct genome-wide association analysis, we can easily obtain  
123 the functional genes related to the anther dehiscence. It is also important to analysis  
124 the molecular mechanism of cotton male reproductive organ respond to stresses.

125 In the past, the acquisition of cotton dehiscent or indehiscent anther number data  
126 from the pictures relied mainly on visual observation and manual counting, it is  
127 difficult to guarantee the accuracy of visual readings because anther growth is  
128 intermingled, resulting in unclear definition of individual anthers, and the background  
129 and foreground of anthers are easily confused. Moreover, a larger amount of anther  
130 data is needed to judge the anther growth and dehiscence status of individual plants in  
131 population under different conditions. However, it is obviously difficult to achieve  
132 this accurately and quickly with manual methods.

133 With the development of computer vision technology and plant phenome platforms,  
134 machine learning-based image processing techniques are widely used. However, in  
135 the training process of machine learning, there is a need to manually extract image  
136 features and feed the obtained classification features into the classifier for learning  
137 after a weighting process. Due to the poor generalization ability of classifiers and the  
138 need for large amounts of supporting data, the shortcomings of machine learning  
139 methods have gradually been exposed in the process of agricultural intelligence  
140 development.

141 In 2012, the concept of deep learning was proposed, and deep learning techniques  
142 have evolved rapidly in the past few years. Image recognition techniques based on  
143 deep learning and convolutional neural networks are gradually replacing machine

144 learning-based image processing techniques in a wide range of fields. Through  
145 classification and extraction of image features and end-to-end training of deep  
146 learning models, computers can accurately detect specific content in images. Through  
147 the building of different datasets and the replacement of deep learning network  
148 architectures, researchers can obtain network models that are more suitable for  
149 research purposes than previous approaches.

150 In this study, using YOLOv5 (Redmon et al., 2016; Redmon and Farhadi, 2017;  
151 Redmon and Farhadi, 2018; Pang et al., 2020; Xu et al., 2020) and Faster R-CNN  
152 (Ren et al., 2017) models, combined with a variety of data augmentation methods, a  
153 cotton anther recognition model based on deep learning was obtained. This model can  
154 quickly batch collected cotton anther images for recognition, detect the dehiscent and  
155 indehiscent anthers, and obtain their phenotypic data.

156 Before the advent of deep learning, the usual machine target recognition process  
157 required human preprocessing of images before target detection and included  
158 cropping, augmentation, and segmentation. Various features of the image were  
159 extracted and handed over to a support vector machine (SVM) classifier (Piccialli and  
160 Sciandrone, 2018) for learning and detection. However, manual preprocessing is  
161 time-consuming and labor-intensive, and after the features are extracted, feature  
162 screening and evaluation must be performed according to the actual situation, and the  
163 weights of various features in the learning model must be artificially adjusted to  
164 achieve the best recognition effect. Against the background of the current state of  
165 machine intelligence, the disadvantages of traditional machine learning are obvious;  
166 the preliminary work requires considerable manual labour, the recognition accuracy is  
167 not ideal, and the technique is difficult to use in actual production.

168 After 2012, image recognition techniques based on deep learning and convolutional  
169 neural networks gradually replaced machine learning-based image processing  
170 techniques in a wide range of fields. The YOLO series, Faster-RCNN and single shot  
171 multibox detector (SSD) (Liu et al., 2016) are three important deep learning neural  
172 network models. Faster-RCNN mainly crawls preselected boxes and then performs  
173 deep learning classification. The image detection process of Faster-RCNN includes

174 crawling region proposal, candidate feature frame extraction, and candidate feature  
175 frame classification. First, the convolution data of whole image is obtained. Then, the  
176 data is automatically fed into a region proposal network (RPN) (Zhu et al., 2021) to  
177 obtain the features of candidate regions. Finally, the features are classified by a  
178 softmax classifier and then adjusting for some special classes using a regressor.  
179 Faster-RCNN is a big improvement over its previous two generations: Fast-RCNN  
180 and RCNN (Girshick et al., 2014) in terms of recognition accuracy and speed. The  
181 CNN family of deep learning models is one of the mainstream models and has  
182 demonstrated powerful functionality in many fields, such as image detection and  
183 semantic segmentation. However, the YOLO model more cleverly uses the idea of  
184 regression by taking the whole image as input, dividing it into several boxed regions,  
185 removing individual boxes with very low relevance by setting specific thresholds, and  
186 finally selecting the highest scoring region with a nonmaximum suppression  
187 algorithm. The model removes the boxes that overlap with it until all alternative boxes  
188 are traversed, yielding the final output. In addition, many scholars are studying  
189 lightweight network structures. For example, MobileNet (Howard et al., 2017) and  
190 SqueezeNet are applied to YOLO networks to further improve their speed of detection  
191 and create the possibility of transplanting YOLO models to portable devices to ensure  
192 the accuracy of recognition as much as possible.

193 To date, no reports of machine learning-based anther identification systems in  
194 academia, but the application of target detection technology to agriculture using  
195 machine learning has been very extensive (Barre et al., 2017; Fuentes et al., 2017;  
196 Ubbens and Stavness, 2017; Gutierrez et al., 2019), which gives us great incentive to  
197 build a deep learning-based anther identification system for cotton. In maize, a  
198 parabolic model has been used to mine the diversity of stem-end meristematic tissues  
199 and to find candidate genes that correlate with the transport of phytohormones, cell  
200 division, and cell size by GWAS (Yang et al., 2007). In rice, the ratio of spikes to  
201 leaves, a new trait of rice, has been extracted using a feature pyramid network mask  
202 model that has achieved leaf and spike recognition accuracies of 0.98 and 0.99,  
203 respectively (Yang et al., 2020). Ferentinos KP has designed a convolutional neural

204 network model to solve the problem of early plant disease detection. Through the  
205 deep learning method, several model structures have been trained with plant leaf  
206 images and have identified the corresponding plant leaf lesions with 99.53% accuracy.  
207 The model has become a powerful tool for the early diagnosis and early warning of  
208 plant leaf diseases and can be further improved. Therefore, the system can be used in  
209 real time in a real cultivation environment (Ferentinos, 2018). Ubbens JR et al. have  
210 designed an open source deep learning tool called Deep Plant Phenomics for plant  
211 phenotypic deep learning. This tool provides pretrained neural networks for several  
212 common plant phenotypic tasks including leaf counting, image classification and age  
213 regression. Botanists can use the neural networks provided and trained by this  
214 platform to train their plant phenotypes (Ubbens and Stavness, 2017). Nikita Genze et  
215 al. have proposed a convolutional neural network-based seed germination status  
216 recognition system that can automatically identify seed categories (including maize,  
217 rye, and pearl millet) in petri dishes and automatically determine whether the seeds  
218 are germinating. The system achieves an average accuracy of 94% on test data and  
219 can help seed researchers to better determine seed quality and performance (Genze et  
220 al., 2020). Scientists use hyperspectral imaging technology to collect spectral and  
221 image information from maize seeds and combine convolutional neural networks and  
222 support vector machines to model and train spectral data sets and image data sets.  
223 This model can quickly detect the vigor state of seeds and simultaneously predict their  
224 germination status, providing a framework to advance research on seed germination  
225 (Pang et al., 2020). A MobileNetv2-YOLOv3-based model that combines pretraining  
226 methods such as hybrid training and migration learning to improve its generalization  
227 for the early identification of tomato leaf spot disease has been proposed (Liu and  
228 Wang, 2021). Image processing and machine learning techniques have been used to  
229 accurately classify the three stages of plant growth and soil for different germplasms  
230 of two species of red clover and alfalfa. The accuracy on test data was shown to be  
231 more than 90% (Samiei et al., 2020).

232 In addition to their applications in computer vision, deep convolutional neural  
233 networks can be used in agricultural production, and they have broad application



234 prospects in the combination of natural language processing (NLP) and agriculture  
235 ([Schmidhuber, 2015](#)). Protein ubiquitylation is an essential posttranslational  
236 modification process that plays a critical role in a wide range of biological functions.  
237 Siraj et al. proposed a method of predicting plant ubiquitin sites by using a hybrid  
238 deep learning model with a deep learning neural network and long-term and  
239 short-term memory. This method uses protein sequences and physical and chemical  
240 properties as the input to the model and approximate ubiquitin sites as its output. In  
241 ten cross-validations, the highest accuracies were shown to be 81% and 82%. This  
242 method improves the current situation of wasted time and person power when using  
243 traditional experimental methods to predict plant ubiquitin sites ([Siraj et al., 2021](#)). J  
244 Wekesa et al. propose a multi-feature fusion prediction model based on deep learning  
245 that combines categorical boosting and extra trees into a single meta-learner. The  
246 model is used to predict the function of plant long noncoding RNAs (lncRNAs).  
247 Experiments on *Zea mays* and *Arabidopsis thaliana* have yielded 0.9820 and 0.9652  
248 areas under precision/recall curves (AUPRCs), respectively ([Wekesa et al., 2020](#)). OA  
249 Montesinos-López have implemented a multi-trait deep learning model with a  
250 feed-forward network topology and a rectified linear unit activation function with a  
251 grid search approach for the selection of hyperparameters. This model covers the  
252 multi-trait prediction of grain yield, days to heading and plant height. The results  
253 indicate that the deep learning method is a practical approach for predicting univariate  
254 and multivariate traits in the context of genomic selection ([Montesinos-López et al.,](#)  
255 [2019](#)).

256  
257

## 258 **Results**

### 259 **YOLOv5 model design**

260 YOLOv5 is a typical one-stage detection model, which increases the detection speed  
261 by 50% compared with the previous generation YOLOv4, and its model size is only  
262 1/10 of that of the previous generation model. The adaptive anchor frame calculation  
263 and the use of Focus structure enhance the accuracy of the model for small target  
264 recognition. At the same time, the model has four network models with different  
265 depths, and the best balance between detection accuracy and recognition speed can be  
266 found. It is very common for cotton anthers to block each other in the image, and the  
267 obscured anthers are easily ignored in the final output of the prediction box. YOLOv5  
268 uses the soft-NMS ([Bodla et al., 2017](#)) method when screening the prediction box.

269 Since cotton anthers overlap and obscure each other, the use of the NMS algorithm  
270 results in an inability to accurately identify adjacent anthers, and only the anther  
271 images with the highest confidence are retained. Therefore, we use the soft-NMS  
272 algorithm. The idea of the NMS algorithm is that for a certain category X having N  
273 candidate boxes, the candidate boxes are sorted by their confidence, and the highest  
274 confidence box A is selected. The other candidate boxes  $B_i$  ( $i=1, 2, 3\dots$ ) are compared  
275 with the highest confidence box A, and an IoU threshold is set. If its IoU is higher  
276 than this threshold, the candidate box  $B_1$  is discarded. Then the candidate box  $B_2$ 's  
277 IoU is compared with that of the highest confidence box A. After several iterations,  
278 only prediction boxes that have an IoU lower than the set IoU value are retained.  
279 Although this method can prevent the same target from being repeatedly selected by  
280 multiple prediction boxes, it cannot prevent overlapping or occluded targets from  
281 being ignored.

282 The idea of Soft-NMS is that M is the current highest scoring box and  $B_i$  is the  
283 pending box. The larger the IoU of  $B_i$  and M, the more the score  $S_i$  of  $B_i$  drops, rather  
284 than having the score go directly to zero as in NMS. This method can effectively  
285 retain anther images that overlap and ensure the accuracy of identification results. The  
286 linear weighting formula for Soft-NMS can be expressed as:

$$S_i = \begin{cases} S_i & IOU(M, b_i) < N_t \\ S_i(1 - IOU(M, b_i)) & IOU(M, b_i) \geq N_t \end{cases}$$

### 289 **Faster R-CNN model design**

290 Faster R-CNN is a classical two-stage object detection network. The network  
291 model structure is mainly composed of four parts: feature extraction, region proposal,  
292 classification, roi pooling and its comprehensive performance has been greatly  
293 improved, especially for the detection accuracy of small targets. The cotton anther  
294 belongs to the range of small target detection in the whole image, so we trained the  
295 Faster R-CNN model to identify the anther dehiscence state has a better detection  
296 effect.

297 Conv layers is a classical CNN network target detection method, mainly includes  
298 three layers of conv, pooling, relu, usually uses to extract the feature maps of the input  
299 image. The extracted feature maps will be called by subsequent region proposal  
300 networks and classification networks. In the convlayers structure, contains 13 conv  
301 layers, 13 relu layers, 4 pooling layers. The Faster R-CNN has a very ingenious detail  
302 in the convlayers, it does augmentation treatment on all convolutional layers, fills a  
303 layer in the outer layer of the input matrix, so that the matrix is larger than it was, and  
304 the images that have been treated in this way are deconvoluted again, and after the  
305 convolution operation, the image is kept consistent with the size of the input image.  
306 The matrix size is unchanged when the image goes through the conv layer and relu  
307 layer, and will change to 1/2 of the original size after going through the pooling layer,  
308 so that when going through the convlayers structure, the size of the input matrix  
309 changes to 1/16 of the original size, so that the resulting feature maps can all  
310 correspond one-to-one with the original graph.

311 Conventional detection methods usually use a sliding window or the selective  
312 search method to acquire detection frames, whereas Faster R-CNN discards  
313 traditional methods and directly generates detection frames using region proposal  
314 networks, which greatly enhances the detection frame generation speed. The region  
315 proposal network structure is actually divided into two processes, the first process by

316 softmax classification anchors, to obtain foreground and background (detection target  
317 is foreground), the second process is used to calculate the bounding box regression  
318 offset for anchors to obtain the exact proposal. Finally, the proposal layer is  
319 responsible for integrating foreground anchors and bounding box regression offset to  
320 obtain proposals, while simultaneously removing proposals too small and beyond the  
321 boundary. The entire Faster R-CNN network arrives to proposal layer, completing  
322 detection targets, the next two structures are mainly image recognition.

323 For the traditional CNN network, the input image of the model must be fixed size,  
324 and the output of the model must be a fixed vector or matrix. In practical applications,  
325 there are two solutions for images of different sizes: cut the picture to a fixed size or  
326 warp the image to a fixed size. However, these solutions will either cause the loss of  
327 image information, or lead to changes in the shape information of the image.  
328 Therefore, the structure roi pooling is proposed in Faster R-CNN to solve the problem  
329 of different image size. Roi pooling is mainly responsible for collecting feature maps  
330 and proposal boxes, calculating proposal feature maps, and sending it to the  
331 subsequent identification layer. First of all, proposal is mapped to the same scale as  
332 feature maps, and then the vertical and horizontal directions of each proposal are  
333 divided into seven parts, so that the output of different sizes of proposal is 7\*7,  
334 realizing fixed-length output.

335 Classification using the obtained proposal feature maps, the structure calculates  
336 which category each proposal belongs to through full connect layers and softmax, and  
337 outputs the probability vector; at the same time, the position offset of each proposal is  
338 obtained again by bounding box regression, which is used to return a more accurate  
339 target detection box.

340 The loss function of the object detection network of Faster R-CNN is shown in

341 Formula:

$$342 \quad L_{reg}(t_i, t_i^*) = \sum_{i \in \{x, y, w, h\}} smooth_{L1}(t_i - t_i^*)$$
$$343 \quad smooth_{L1}(x) = \begin{cases} 0.5x^2 & \text{if } |x| < 1 \\ |x| - 0.5 & \text{otherwise} \end{cases}$$

344 In the above-mentioned formula,  $i$  represents anchors index;  $t$  represents predict  
345 bounding box;  $t^*$  represents ground true box corresponding to positive anchor;  $x$ ,  $y$ ,  $w$ ,  
346  $h$  represents center point coordinates of box, width, height.

347

### 348 **Data augmentation**

#### 349 **Auto augment**

350 This approach creates a search space for data-enhanced policies in which a policy  
351 contains many sub-policies and randomly selects one sub-policy for each image in a  
352 small batch data set. Each sub strategy consists of two operations, each of which is an  
353 image processing function similar to flattening, rotation, or shearing, and the probability  
354 and magnitude of applying those functions, using a search algorithm directly on the  
355 data set to find the best data augmentation strategy.

#### 356 **Random Resize**

357 Random Resize scales the new image to the same pixel size as the original image  
358 by randomly clipping the original image in the data set according to the random  
359 aspect ratio.

#### 360 **Random Flip**

361 Random Flip is a common way of data augmentation, which generates new data set  
362 samples by randomly flipping the original image of the data set up and down or left  
363 and right.

#### 364 **Mixup**

365 Mixup is a data augmentation method for mixing two samples and label data at  
366 their corresponding ratios and then generating new sample and label data. Suppose  $x_1$   
367 is a sample of batch one,  $y_1$  is the label corresponding to the sample of batch one;  $x_2$  is  
368 the sample of batch two,  $y_2$  is the sample corresponding label of batch two,  $x_{mix}$  and  $y_{mix}$   
369 is the newly generated sample and corresponding label, respectively.  $\lambda$  is the mixing  
370 coefficient resulting from the hyperparametric  $\alpha$  and  $\beta$  conducted beta distributions.  
371 The principal formula of the mixup method can be expressed as:

$$372 \quad x_{mix} = \lambda x_1 + (1 - \lambda)x_2$$

373  $y_{mix} = \lambda y_1 + (1 - \lambda) y_2$

374  $\lambda \sim \text{Beta}(\alpha, \beta) \quad \alpha, \beta \in [0, +\infty]$

375 According to the study, we know that as the hyperparameters  $\alpha$  and  $\beta$  increase, the  
376 error and generalization ability of the network training will increase. When the beta  
377 distribution of the mixing coefficient  $\lambda$  is  $\alpha=\beta=0$ , the network recovers to the ERM  
378 (Empirical Risk Minimization) principle to minimize the training data average error;  
379 the beta distribution of the mixing coefficient  $\lambda$  has the best generalization ability and  
380 robustness. This method can make full use of all the pixel information, but at the same  
381 time also introduces some unnecessary pseudo-pixel information.

### 382 **Cutmix**

383 Cutmix (Yun et al., 2019) is by cut some regions in the sample and randomly fill in  
384 the pixel values of other samples in the data set, and at the same time distribute the  
385 final classification results according to a certain proportion. Compared with mixup,  
386 cutmix can prevent the occurrence of non-pixel information in the training process.  
387 Filling the pixel information of other regions with the missing area of cut can further  
388 enhance the positioning ability of the model. At the same time, this method will not  
389 increase the training and reasoning burden of the model.

### 390 **GridMask**

391 By generating a mask with the same resolution as the original image, GridMask  
392 multiplies the mask with the original image to get a new image. The pixel value of the  
393 new image in the fixed area is 0, which is essentially a regularization method.  
394 Compared with directly changing the network structure, GridMask only needs to be  
395 augmented when the image is input.

### 396 **Normalized**

397 We usually use this method after data augmentation, normalizing the pixel value of  
398 the image and scaling the pixel value to  $[0,1]$  can prevent the attributes of the large  
399 value interval from excessively dominating the attributes of the decimal value interval,  
400 and at the same time avoid the numerical complexity in the process of calculation.

401 In this study, the data augmentation process was shown in the [Figure 1](#).

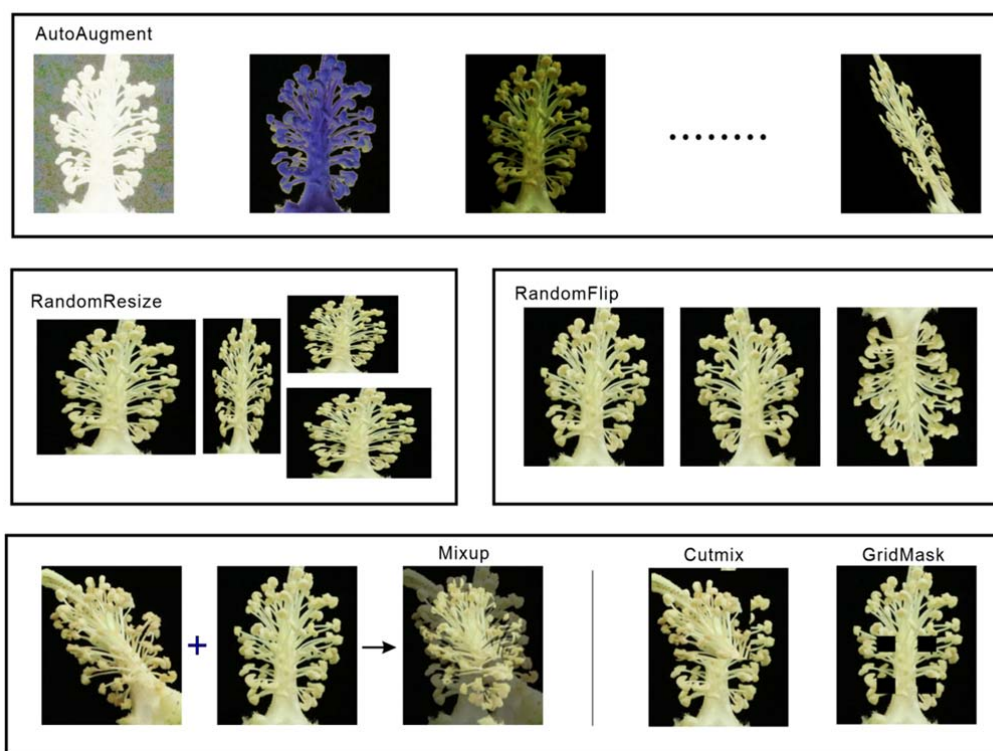

**Figure 1: Data augmentation**

The images above showed the effect of the same cotton anther image processed with different data augmentation methods.

402

### 403 **Model training**

404 In this study, comparative experiments and control variables were used, YOLOv5 and  
405 Faster-RCNN models were used, and various data demonstration methods such as  
406 mixing and mixed cutting were used to train for sample imbalance, so as to verify the  
407 performance of different models and training methods on the same evaluation index  
408 validation set. Firstly, the self-made data set was segmented and analyzed, and VOC  
409 format was used to store training set, test set and verification set. Secondly, the model  
410 was trained according to whether the data demonstration algorithm was added. Finally,  
411 cosine strategy was used to periodically attenuate the learning rate. The training ends  
412 when the average loss remains stable. In this study, the training process of Faster  
413 R-CNN model was shown in the [Figure 2](#).

414 The models obtained by different training strategies were tested on the test set and

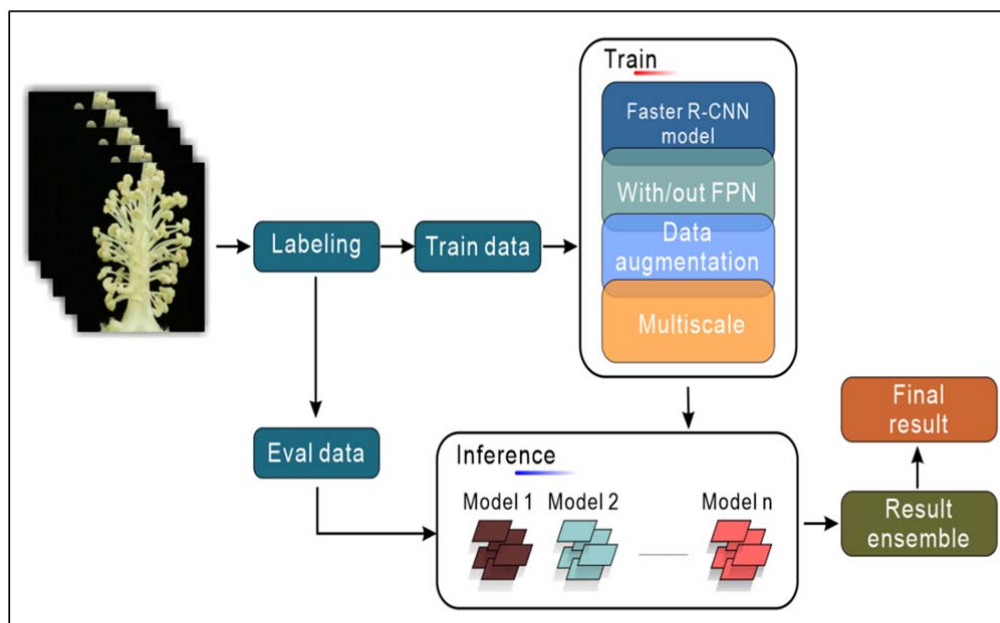

**Figure 2: Model ensembles**

Integrated flow chart of cotton anther recognition model ensembles.

415 the prediction results of multiple models were obtained. The results of the four groups  
416 of comparison experiments indicated that the proposed Faster R-CNN neural network  
417 with data augmentation and FPN structure and Multi-Scale could effectively detect  
418 the dehiscence and indehiscence in cotton anther images. Compared with other  
419 methods, this method has significant advantages in recognition accuracy. The  
420 recognition effect was shown in the [Figure 3](#). The final result was obtained by the  
421 prediction results ensembles of multiple models.

422

### 423 **Model comparison**

#### 424 **Comparison of detection results of Faster R-CNN and YOLOv5**

425 Faster R-CNN and YOLOv5 are used to train the same training set, the test results  
426 are compared on the same test set, and the correlation between the test results and the  
427 accurate value of manual labeling is analyzed. YOLOv5 using Darknet53 as the  
428 backbone network is a typical single-stage model, while Faster R-CNN using Res101  
429 as the backbone network is a standard two-stage model. Obviously, YOLOv5 is more  
430 advantageous in detection speed. A comparison of the two models was shown in



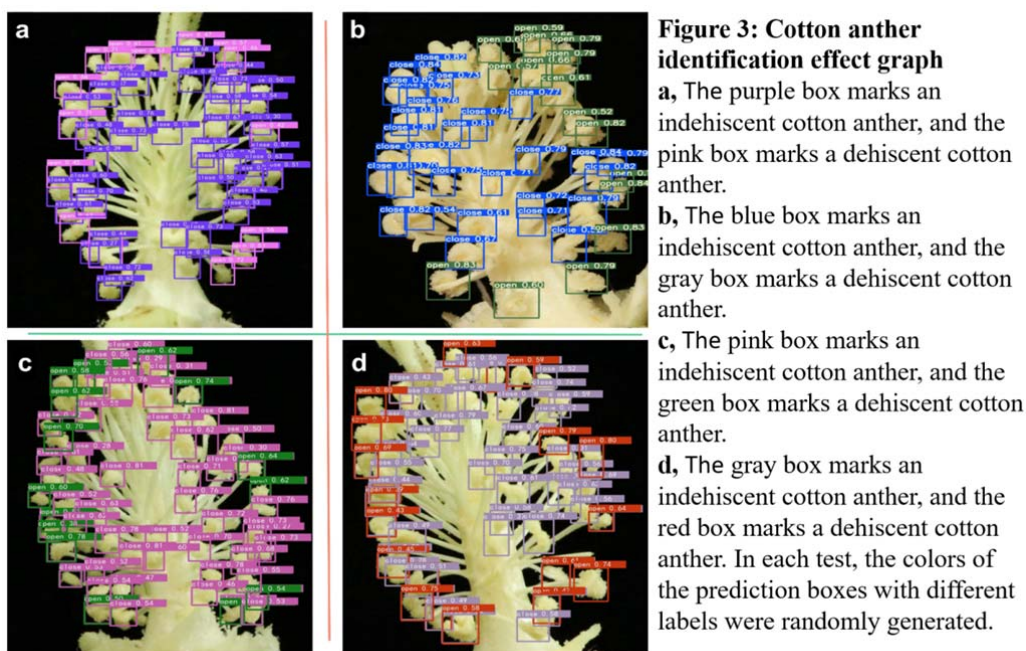

431 **Figure 4a.** Through training and validation, we found that  $mAP@0.5:0.95$  of  
432 YOLOv5 was 0.485, while  $mAP@0.5:0.95$  of Faster R-CNN was 0.478. In  
433  $mAP@0.5:0.95$ , YOLOv5 was 0.007 higher than Faster R-CNN. In terms of the  
434 evaluation index of  $R^2$  in the validation set, the Faster R-CNN was 0.8712 in the  
435 category of "open" and 0.8373 in the category of "close", and 0.82 in the category of  
436 "all", which were 0.2523, 0.2619, and 0.3104 higher than YOLOv5, respectively. This  
437 may be due to the interference of location information. Although YOLOv5 has a  
438 slightly higher  $mAP@0.5:0.95$ ,  $R^2$  is far lower than Faster R-CNN (**Table S1**). Since  
439 quantitative accuracy is our primary research goal, we decided to further optimize the  
440 two-stage model Faster R-CNN.

#### 441 **Comparison of detection results with or without FPN (Feature Pyramid** 442 **Networks)**

443 To further improve the detection effect of the Faster R-CNN model, the FPN  
444 structure was added into the Faster R-CNN model. A comparison of the two models is  
445 shown in **Figure 4b**. The  $mAP@0.5:0.95$  of Faster R-CNN with data augmentation  
446 was 0.48. For the  $R^2$  of the correlation of test value with the real value, Faster R-CNN  
447 with FPN structure have 0.8676, 0.8403 and 0.812 in the category of "open", "close",

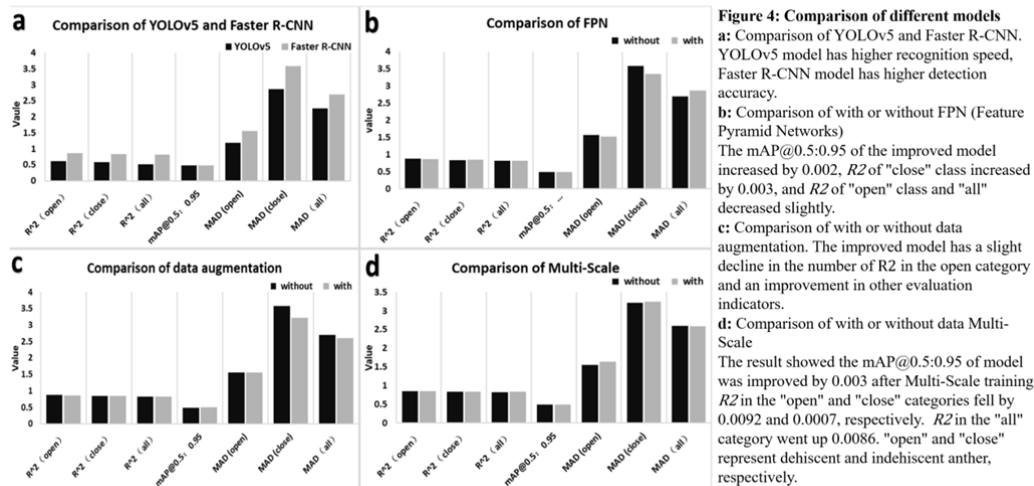

448 and "all". Compared with that without FPN structure, mAP@0.5:0.95 of the improved  
 449 model increased by 0.002 (Figure 5, model 1 and 3),  $R^2$  of "close" class increased by  
 450 0.003, and  $R^2$  of "open" class and "all" decreased slightly (Table S2).

#### 451 Comparison of detection results with or without data augmentation

452 The traditional Faster R-CNN model was taken without data augmentation. To  
 453 avoid the effect of the sample imbalance, many kinds of data augmentation methods  
 454 were added to the basic model, such as mixup, cutmix. The model with and without  
 455 data augmentation were trained and tested on the same data set, and these detection  
 456 results and correlations with the real value of manual labeling were compared. A  
 457 comparison of the two models is shown in Figure 4c. We found that the  
 458 mAP@0.5:0.95 of Faster R-CNN with data augmentation was 0.494, which was 0.016  
 459 higher than that of Faster R-CNN without data augmentation (Figure 5, model 1 and  
 460 2). For the  $R^2$  of the correlation of test value with the real value, Faster R-CNN with  
 461 data augmentation were 0.8579, 0.8401 and 0.8235 in the category of "open", "close",  
 462 and "all", respectively. The  $R^2$  in the category of "close" and "all" of Faster R-CNN  
 463 with data augmentation were 0.0028 and 0.0035 higher than that of Faster R-CNN  
 464 without augmentation. While  $R^2$  in the "open" category of Faster R-CNN with data  
 465 augmentation was 0.0133 lower than that of Faster R-CNN without data augmentation.  
 466 Overall, the evaluation showed that the performance of Faster R-CNN with data  
 467 augmentation is higher than that of Faster R-CNN without data augmentation (Table

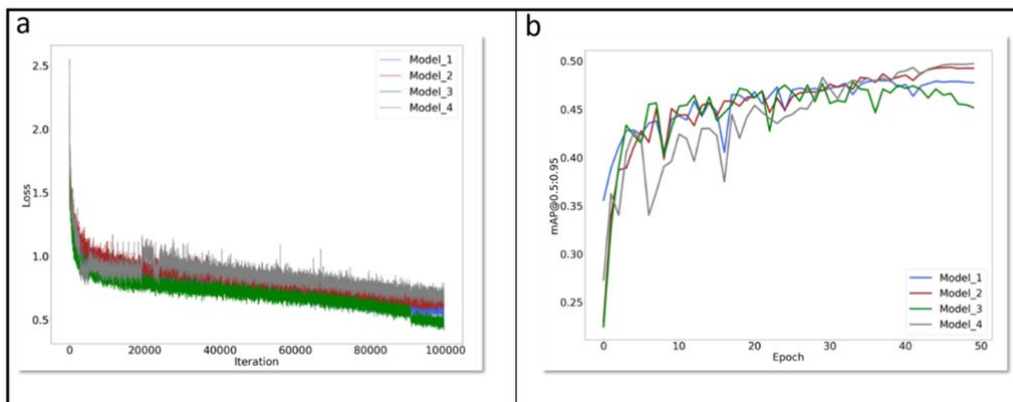

**Figure 5: mAP@0.5:0.95 curves and LOSS curves**

**Model 1** is the Faster R-CNN with FPN structure. **Model 2** is the Faster R-CNN with data augmentation and FPN structure. **Model 3** is the traditional Faster R-CNN. **Model 4** is the Faster R-CNN with Multi-Scale and data augmentation and FPN structure. **Epoch**: All the data were sent into the network to complete a process of forward calculation and back propagation. **mAP@0.5:0.95** is the process of increasing IoU from 0.5 to 0.95 according to the span of 0.05. The mAP corresponding to each IoU was added to obtain the average value of mAP in this process.

468 S3).

#### 469 **Comparison of detection results with or without Multi-Scale**

470 To test whether the multi-scale training can improve the accuracy of the quantity of  
471 dehiscent anther, we added Multi-Scale on the basis of the traditional Faster R-CNN  
472 model. The specific content is to obtain the image pyramid at different scales, and  
473 then extract the features of different scales for each layer of images to obtain the  
474 feature map. Finally, the features of each scale are individually predicted. A  
475 comparison of the two models was shown in Figure 4d. The result showed the  
476 mAP@0.5:0.95 of model was improved by 0.003 after Multi-Scale training (Figure 5,  
477 model 4 and 2).  $R^2$  in the "open" and "close" categories fell by 0.0092 and 0.0007,  
478 respectively.  $R^2$  in the "all" category went up 0.0086. Thus, Multi-Scale training has a  
479 certain effect on our research goal of cotton anther identification (Table S4).

480 In this study, the change curves of each model in mAP@0.5:0.95 during the  
481 training process were shown in Figure 5. The peak value of traditional Faster-CNN  
482 mAP@0.5:0.95 curve was the lowest, while the peak value of Faster R-CNN model  
483 with data augmentation, Multi-Scale training and FPN structure was the highest. The  
484 loss curve of each model during the training process was shown in Figure 5. At the  
485 end of the training, the loss curve of the four models has tended to be stable.

#### 486 **Screening of HT tolerant cotton germplasms based on cotton anther phenotype**

487 **data obtained using integrated Faster R-CNN model**

488 In order to select high temperature (HT) tolerant cotton germplasms, the anther  
489 pictures of different cotton lines were obtained under normal temperature (NT) and  
490 HT. Then we counted the dehiscence status of anthers from 30 different cotton lines  
491 by manual observation and machine recognition, and the statistical results were shown  
492 in [Table 1](#). The results of manual observation showed that the average dehiscence rate  
493 of cotton anthers treated with NT and HT were 84.35% and 35.46% respectively, and  
494 the results of machine recognition showed that the average dehiscent rates of cotton  
495 anthers treated with NT and HT were 83.81% and 35.08% respectively. First of all,  
496 we can believe that for the acquisition of the phenotypic data of cotton anther  
497 dehiscence rate, the result of machine recognition has been extremely accurate, and  
498 the recognition speed is fast, which is not affected by artificial subjective factors, save  
499 manpower and material resources, there are obvious advantages compared with  
500 manual observation. Secondly, there is a great difference in the anther dehiscent rate  
501 of the same cotton variety between HT and NT conditions. The result showed that HT  
502 greatly reduced the cotton anther dehiscent rate ([Table 1](#)), and then affected the  
503 pollination process, resulting in a reduction in cotton yield. Finally, by observing 30  
504 cotton lines, we found that the anther dehiscent rate of S003 and S004 was still more  
505 than 85% under HT stress, which was significantly improved compared with other  
506 lines ([Table 1](#)). In addition, we screened cotton lines with HT tolerance in large  
507 quantities through machine recognition, and obtained more than 35 HT tolerant cotton  
508 lines. These HT tolerant germplasms will be used in cotton HT tolerance breeding.

**Table 1: Screening of HT tolerant cotton germplasms using integrated Faster R-CNN model**

| Variety        | Manual count       |                   |                   |                   |                   |                   | Machine count      |                  |                   |                   |                   |                   |
|----------------|--------------------|-------------------|-------------------|-------------------|-------------------|-------------------|--------------------|------------------|-------------------|-------------------|-------------------|-------------------|
|                | Normal temperature |                   |                   | High temperature  |                   |                   | Normal temperature |                  |                   | High temperature  |                   |                   |
|                | Open               | Close             | Dehiscent rate(%) | Open              | Close             | Dehiscent rate(%) | Open               | Close            | Dehiscent rate(%) | Open              | Close             | Dehiscent rate(%) |
| S001           | 39.5±2.02          | 5.75±0.94         | 87.17±2.3         | 34.75±4.21        | 15±4.76           | 70.41±8.26        | 38.25±2.39         | 5.5±1.32         | 87.31±2.97        | 35.25±2.92        | 13.75±3.9         | 72.47±6.85        |
| S002           | 26.25±3.49         | 17.25±1.37        | 78.6±2.25         | 9.25±2.14         | 17±2.2            | 65.68±3.41        | 26.75±3.75         | 7±1.29           | 79.35±2.25        | 17.25±1.31        | 8.5±1.76          | 68.06±3.13        |
| <b>S003</b>    | <b>42.25±2.92</b>  | <b>11.25±2.01</b> | <b>78.84±3.82</b> | <b>30±6.17</b>    | <b>4±1.58</b>     | <b>86.55±5.03</b> | <b>40.25±2.86</b>  | <b>11±1.87</b>   | <b>78.54±3.25</b> | <b>30.25±5.76</b> | <b>5±1.82</b>     | <b>84.46±5.56</b> |
| <b>S004</b>    | <b>32.25±2.28</b>  | <b>3±1.22</b>     | <b>91.86±3.02</b> | <b>27.25±0.62</b> | <b>2±0.91</b>     | <b>93.27±3.02</b> | <b>32.25±2.28</b>  | <b>2.25±0.75</b> | <b>93.63±1.92</b> | <b>27±0.7</b>     | <b>2.25±0.75</b>  | <b>92.4±2.44</b>  |
| S005           | 27.25±3.9          | 9.75±3.94         | 77.32±7.54        | 29.25±2.81        | 18.25±5.12        | 36.19±5.06        | 26.75±4.42         | 10.25±3.59       | 74.14±6.48        | 17.5±4.13         | 29.25±2.95        | 36.12±4.43        |
| S006           | 28.75±1.38         | 6±1.08            | 83.97±2.31        | 18.25±1.37        | 13±4.22           | 61.04±9.65        | 28.25±1.44         | 5.5±0.65         | 83.86±1.01        | 18.5±0.86         | 12.75±3.9         | 61.75±8.76        |
| S007           | 20.75±3.59         | 5.75±1.75         | 76.92±8.33        | 16.25±2.53        | 11.5±1.19         | 42.3±4.65         | 19.75±2.68         | 6±1.68           | 76.08±7.37        | 10.75±0.63        | 18±2.27           | 37.94±1.81        |
| S008           | 17±3.08            | 6±0               | 72.69±3.06        | 12.25±0.75        | 18.5±1.19         | 39.95±2.81        | 18.25±3.25         | 5.75±0.25        | 74.95±2.57        | 10.5±0.28         | 19.5±0.64         | 35.03±0.95        |
| S009           | 25±2.85            | 4.5±1.7           | 86.35±3.53        | 13.5±0.5          | 17±2.94           | 45.62±5.17        | 22.5±2.72          | 5.5±1.5          | 80.64±4.45        | 13.25±0.75        | 15.5±2.25         | 46.97±4.96        |
| S010           | 24.25±2.56         | 5.5±1.44          | 82.31±3.49        | 12.5±1.44         | 21.75±2.17        | 36.39±1.82        | 23.75±2.75         | 6±1.58           | 80.87±3.52        | 11±0.57           | 21.5±1.93         | 34.04±1.27        |
| S011           | 24.25±4.49         | 4±0.91            | 85.81±1.41        | 8±2.85            | 24.5±6.73         | 19.77±7.44        | 23.5±4.34          | 3.25±0.62        | 87.28±1.94        | 8±2.67            | 23.25±6.14        | 20.43±7.04        |
| S012           | 28.25±2.52         | 2.5±0.5           | 91.51±1.97        | 0±0               | 29.25±8.6         | 0±0               | 26.5±1.84          | 2.25±0.62        | 91.9±2.57         | 0.5±0.5           | 28±8.33           | 4.545±4.54        |
| S013           | 27.5±6.06          | 3.75±0.75         | 86.79±3.53        | 0.25±0.25         | 45±5.11           | 0.5±0.5           | 24.75±5.45         | 4.25±0.47        | 84±3.15           | 0±0               | 43.75±3.19        | 0±0               |
| S014           | 29.75±4.53         | 6.75±2.09         | 81.08±5.81        | 3.25±3.25         | 37.25±1.88        | 7.22±7.22         | 28.5±3.79          | 6.5±2.21         | 81.08±6.17        | 3.75±3.42         | 38±2.44           | 8.164±7.44        |
| S015           | 32.25±1.03         | 3.75±1.1          | 90.01±2.61        | 17.25±4.26        | 20.75±3.01        | 44.65±8.45        | 31.5±0.64          | 3.75±1.1         | 89.76±2.71        | 16.75±3.49        | 18.75±1.43        | 45.98±5.93        |
| S016           | 22.75±3.47         | 4±1.58            | 86.06±6.08        | 14.75±0.63        | 7.25±1.03         | 67.39±3.2         | 22.25±3.19         | 4.5±1.19         | 83.23±4.37        | 14±0.58           | 7.5±1.04          | 65.48±3.34        |
| S017           | 32.75±2.39         | 8.25±4.44         | 81.68±9.2         | 12.5±1.04         | 22.25±4.39        | 37.12±3.56        | 32±2.27            | 8.5±4.42         | 80.75±9.66        | 12.5±1.19         | 22.25±3.68        | 36.64±2.97        |
| S018           | 31.5±1.5           | 2.25±0.47         | 93.42±1.31        | 10.75±0.95        | 21±2.35           | 34.07±1.61        | 30.5±0.95          | 2.75±0.47        | 91.75±1.32        | 12.75±0.75        | 21±1.08           | 37.82±2.19        |
| S019           | 22.75±1.03         | 3.25±1.18         | 88.39±4.22        | 14.25±1.49        | 10±1.63           | 58.91±5.47        | 22±0.91            | 3.5±1.32         | 87.58±4.48        | 13.75±1.11        | 10.5±1.85         | 57.4±4.71         |
| S020           | 29±3.1             | 4.25±1.18         | 86.98±3.78        | 0.75±0.48         | 29.5±8.53         | 3.55±2.8          | 26.25±1.93         | 3.75±1.03        | 87.58±3.06        | 0.5±0.5           | 30±6.94           | 2.63±2.63         |
| S021           | 28±0.41            | 3±1.08            | 90.58±3.16        | 10.75±3.09        | 22.75±6.34        | 32.5±6.02         | 29.57±0.85         | 3±0.91           | 90.96±2.6         | 9.75±2.93         | 23±5.4            | 29.34±4.63        |
| S022           | 29.5±5.1           | 2±0.91            | 93.95±2.75        | 0.25±0.25         | 45.25±3.09        | 0.51±0.51         | 28±4.45            | 1.75±1.03        | 94.65±3.17        | 0±0               | 43.75±3.19        | 0±0               |
| S023           | 26.25±2.09         | 2.5±0.28          | 91.06±1.51        | 0.5±0.28          | 43.25±6.42        | 1.045±0.6         | 25.25±1.37         | 2.5±0.28         | 90.91±1.19        | 0.5±0.28          | 43.5±6.33         | 0.994±0.57        |
| S024           | 30±4.65            | 6.75±1.7          | 80.44±5.82        | 0.75±0.48         | 37.75±2.66        | 2.07±1.43         | 28.5±3.79          | 6.5±2.21         | 81.08±6.17        | 0.75±0.75         | 38.5±3.88         | 2.34±2.34         |
| S025           | 18.75±3.32         | 7±0.7             | 71.34±5.16        | 13.5±0.65         | 21.75±3.33        | 39.36±4.57        | 19.25±3.17         | 8.5±1.19         | 68.31±5.9         | 14.5±0.29         | 22.75±3.17        | 39.82±3.47        |
| S026           | 32.5±1.04          | 3.75±1.1          | 89.99±2.76        | 3±1.68            | 41.75±7.9         | 9.35±6.76         | 31.5±0.64          | 3.75±1.1         | 89.76±2.71        | 3±2.34            | 42.25±8.73        | 9.669±8.28        |
| S027           | 23±3.82            | 4.75±1.37         | 83.29±3.76        | 13.5±1.19         | 7.25±0.75         | 65.03±2.37        | 22.25±3.19         | 4.5±1.19         | 83.23±4.37        | 14±0.58           | 7.5±1.04          | 65.48±3.44        |
| S028           | 31.25±2.89         | 4.25±1.49         | 87.53±4.6         | 5.25±1.93         | 20.5±3.96         | 19.19±4.81        | 31±1.87            | 4.75±1.18        | 86.58±3.46        | 5.25±2.75         | 21.25±4.47        | 14.49±7.04        |
| S029           | 9.25±3.07          | 2.75±0.25         | 72.05±6.26        | 0.5±0.5           | 10±0.82           | 3.57±3.57         | 8.5±3.18           | 2.5±0.29         | 71.18±6.45        | 0.5±0.29          | 10±0.91           | 4.42±2.6          |
| S030           | 21.75±2.8          | 4.25±0.25         | 83.15±1.67        | 11.25±0.25        | 18.25±0.48        | 38.15±0.57        | 20.75±1.93         | 4±0.4            | 83.79±1.07        | 11.25±0.85        | 17±1.35           | 39.87±0.67        |
| <b>Average</b> | <b>27.2±0.36</b>   | <b>4.95±0.55</b>  | <b>84.35±1.23</b> | <b>11.21±0.77</b> | <b>22.03±0.96</b> | <b>35.46±1.61</b> | <b>26.25±0.31</b>  | <b>4.98±0.5</b>  | <b>83.81±1.17</b> | <b>11.11±0.68</b> | <b>21.97±0.81</b> | <b>35.08±1.76</b> |

Open: the average number of dehiscent anthers from different flowers, n>4; Close: the average number of indehiscent anthers from different flowers, n>4; Dehiscent rate: the number of dehiscent anthers of each flower/(the number of dehiscent anthers of each flower + the number of indehiscent anthers of each flower), n>4.

509

510

511 **Discussion**

512 Through analysis, we found that the mAP@0.5:0.95 value of the model increased  
513 significantly after adding data augmentation and FPN structure and Mult-Scale, but  
514 the change of  $R^2$  was not significantly positively correlated with mAP@0.5:0.95. In  
515 order to obtain the most accurate data in the application, four models were trained, as  
516 shown in Figure 5 and tested them on the same batch of test sets. The recognition  
517 results obtained were integrated by the following formula:

518 
$$\text{result}_{\text{open}} = \frac{\sum_{i=1}^4 \text{model}_i^{\text{open}}}{4}$$

519 
$$\text{result}_{\text{close}} = \frac{\sum_{i=1}^4 \text{model}_i^{\text{close}}}{4}$$

520 Among those,  $i$  represents the number of the model in Figure 5.  $\text{Model}_i^{\text{open}}$   
521 represents the number of dehiscent cotton anthers identified by  $\text{model}_i$  in the  
522 verification set.  $\text{Model}_i^{\text{close}}$  represents the number of indehiscent cotton anthers  
523 identified by  $\text{model}_i$  in the verification set.

524 After the comparison with the real value, it is found that when the model is  
525 integrated, the detection result after ensemble effectively compensates for the error,  
526 and the correlation between the detection result and the real value will increase. After  
527 the ensemble of the four models,  $R^2$  of “open” reaches 0.8765,  $R^2$  of “close” reaches  
528 0.8539,  $R^2$  of “all” reaches 0.8481, higher than the prediction result of either model  
529 alone. Therefore, when accurate data is needed, we can choose to integrate the  
530 detection results of the four models, so that the detection data obtained is the most  
531 reliable. Of course, directly using Faster R-CNN model with FPN structure and data  
532 augmentation and multi-scale has higher robustness and higher accuracy.

533 It is well known that anther is the male organ of plant, anther abortion will directly  
534 lead to male sterility and reduce yield. Our previous studies could be preliminarily  
535 concluded that HT stress can reduce cotton yield by inhibiting cotton male fertility.  
536 HT mainly decreased pollen viability, the anther growth number, and the percentage

537 of dehiscent anther, caused the decreases of male fertility in cotton (Min et al., 2014;  
538 Ma et al., 2018). So far, no genes involved in HT affecting cotton male fertility have  
539 been cloned. Thus, further molecular biological methods can respond to this  
540 mechanism from the perspective of genes and improve cotton crop yield. Through the  
541 trained augmentation Faster R-CNN rapid identification system of cotton anther  
542 phenotype, can quickly investigate the anther phenotype and used to location of the  
543 genes affecting cotton anther dehiscence under HT. This will effectively promote HT  
544 resistance breeding of cotton and ensure cotton safe production under the trend of  
545 global warming.

546

## 547 **Conclusions and future directions**

### 548 **Conclusions**

549 1. A cotton anther phenotype recognition system based on deep learning is  
550 proposed for the first time, which can help researchers to quickly investigate the  
551 anther phenotype of cotton and locate the genes that respond to the influence of stress  
552 on cotton anther for breeding improvement.

553 2. A lightweight cotton anther dehiscence detection model based on YOLOv5 is  
554 proposed, which can be easily implanted into embedded devices or mobile devices.

555 3. Through the change of the accuracy and correlation of Faster R-CNN after the  
556 improvement of the data augmentation method, the feasibility and superiority of the  
557 improved method were verified. Model enhanced by data.

558 4. After the ensemble of the four models,  $R^2$  of “open” reaches 0.8765,  $R^2$  of “close”  
559 reaches 0.8539,  $R^2$  of “all” reaches 0.8481, higher than the prediction result of either  
560 model alone, and can completely replace the manual counting method. It provides  
561 new technical support for cotton reproductive development and HT tolerance  
562 breeding.

563

### 564 **Future directions**

565 In this study, YOLOv5 and Faster R-CNN were applied to identify the dehiscence  
566 state of cotton anther, and achieved fast and accurate identification. But there are still

567 some areas where there is room for improvement:

568 1. We only examined the dehiscence of cotton anthers, but other phenotypes such  
569 as the growth position of anthers and the distance between anthers and stigmas are  
570 also important for the reproductive development of cotton. Other phenotypic  
571 characteristics of cotton anther can be collected by using a comprehensive platform  
572 that integrates multiple data points to analyze cotton reproductive development.

573 2. The cotton anther dehiscence recognition model trained in this study should be  
574 further developed and applied to other computer platforms or servers to facilitate  
575 cotton reproductive development researchers to use the model to quickly obtain anther  
576 dehiscence data.

577 3. In this study, the experience of deep learning model training for cotton anther  
578 dehiscence can be applied to other plant anther state detection. It is one of the  
579 directions to further enrich the research content to further construct cotton anther state  
580 recognition models of various crops based on deep learning.

581

## 582 **Materials and methods**

### 583 **Material growing and dataset acquisition**

584 In total, 510 cotton lines from natural populations were planted in 2016-2019 in  
585 experimental cotton fields at Huazhong Agricultural University, Wuhan, Hubei  
586 (113.41E, 29.58N), Turpan, Xinjiang (89.19E, 42.91N), and Alar, Xinjiang (81.29E,  
587 40.54N). At Wuhan, the field was planted at a density of 27,000 plants per hectare  
588 with each row including more than 12 individuals. At Alar and Turpan, Xinjiang, the  
589 fields were set up with two streets and planted at a density of 195,000 plants per  
590 hectare. More than 30 individuals of each line were arranged in rows. Cotton anther  
591 images were collected each year at each location three days after the onset of normal  
592 temperatures and after high temperatures during bloom.

593 A Canon 70 d HD digital camera was used throughout the acquisition of a research  
594 image set. To prevent the negative interference of background with the subsequent  
595 machine recognition effort, a black curtain was used as the photo background for this  
596 experiment. In the actual image collection process, it was found that the cotton



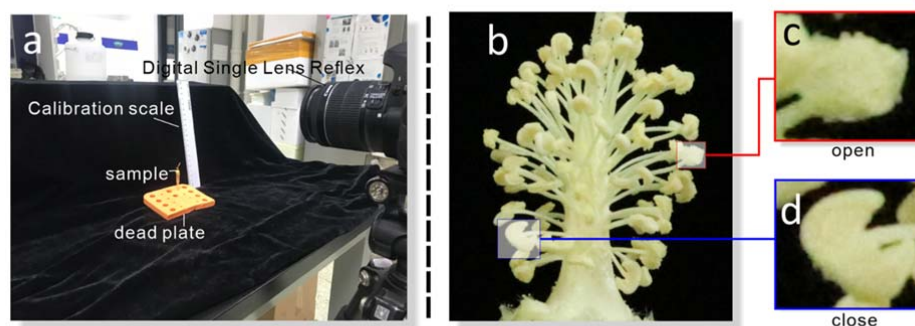

**Figure 6: Data acquisition.**

**a:** The image dataset captures the platform scene. **b:** Image of cotton anther. **c:** The surface of dehiscient cotton anther (open) is rough from the image. **d:** The surface of indehiscent cotton anther (close) is smooth from the image.

597 anthers were surrounded by cotton petals, and the anthers growing at the root of the  
598 style were not easily captured by the camera, so it was not conducive to the accurate  
599 collection of data to take the pictures directly. Thus, it was necessary to preprocess the  
600 cotton flowers before acquiring the pictures by stripping the cotton petals and fixing  
601 the anther sides. To prevent overfitting, the model due to insufficient training data, the  
602 same anthers were included in multiple distant near-field images (Figure 6). Finally, a  
603 total of 2,845 high-definition RGB anther images were acquired.

604 Morphologically, dehiscient anthers are rough and grainy because pollen is  
605 released and adheres to anther edges, while indehiscent anthers have smooth edges,  
606 because no pollen is released. Therefore, the obtained cotton anther images were  
607 annotated using Labeling image annotation software, as shown in Figure S1. The  
608 image boundary of each visible cotton anther is within an annotation box that reduces  
609 the influence of background on model training and is labeled “open” and “close” to  
610 distinguish dehiscient and indehiscent anthers, respectively. A total of 2,845 images  
611 were annotated one by one. The images were used as the data set and were randomly  
612 divided into a training set and validation set in the ratio of 7:3 (Table S5).

### 613 **Experimental operation environment**

614 The hardware environment used in this study is in Table S6, and on this basis, the

615 training environment is python, open-cv, cuda, etc., and the frameworks used in this  
616 study are paddle and pytorch.

### 617 **Metrics used to evaluate the proposed method**

618 In this study, we use mAP@0.5:0.95, as well as MAD (Mean Absolute Deviation)  
619 and  $R^2$  as the evaluation indicators of the model. The indicators are explained as  
620 follows:

621 mAP@0.5:0.95 is the process of increasing IoU from 0.5 to 0.95 according to the  
622 span of 0.05. The mAP corresponding to each IoU is added to obtain the average  
623 value of mAP in this process. The formula is expressed as follows:

$$624 \quad P = \frac{T_P}{P_N}$$

$$625 \quad R = \frac{T_P}{T_N}$$

$$626 \quad AP = \int_0^1 P(R) dR$$

627 In the above formula,  $T_P$  is the correct number of a category identified by the  
628 model,  $P_N$  is the total number of categories identified by the model, and  $T_N$  is the true  
629 number of a category. Averaging the AP values of all categories is called mAP.

630 We took the absolute value of the absolute error between the measured value and  
631 the real value and then calculate the average value, and called it the MAD. Due to the  
632 deviation is absolute value, the positive and negative will not be offset, thus the mean  
633 absolute error can reflect the actual situation of predicted value deviation. The smaller  
634 the value, the closer the prediction of model is to reality.

635 The main purpose of this study is to develop a deep learning model that can quickly  
636 and accurately identify anther dehiscence and explore the influence of high  
637 temperature stress on cotton anther dehiscence. In the model identification phase, we  
638 identify the location of the cotton anther without strict requirements, but we demand  
639 model to recognize the number with the result of artificial observation is the most  
640 close to, so the number by artificial observation to anther as accurate value of  
641 validation set was used, with correlation coefficient between predicted values and the

642 accurate value as the main evaluation index of the model.

643

## 644 **Supplemental Materials**

### 645 **Figure S1: Image labeling**

646 The obtained cotton anther images were annotated using “Labeling” image annotation  
647 software. Green boxes represent indehiscent anthers and red boxes represent dehiscent  
648 anthers. When the image labeling was finished, we corresponded the location  
649 information of the image with the name of the image one by one and saved it in VOC  
650 format.

651 **Table S1:** Comparison of YOLOv5 and Faster R-CNN

652 **Table S2:** Comparison of FPN

653 **Table S3:** Comparison of data augmentation

654 **Table S4:** Comparison of Multi-Scale

655 **Table S5:** Dataset

656 **Table S6:** Experimental configuration

657

## 658 **Acknowledgements**

659 Appreciations are given to the editors and reviewer.

660

## 661 **Figure Legends**

### 662 **Figure 1: Data augmentation**

663 The images above showed the effect of the same cotton anther image processed with  
664 different data augmentation methods.

### 665 **Figure 2 : Model ensembles**

666 Integrated flow chart of cotton anther recognition model ensembles.

### 667 **Figure 3 : Cotton anther identification effect graph**

668 **a**, The purple box marks an indehiscent cotton anther, and the pink box marks a  
669 dehiscent cotton anther. **b**, The blue box marks an indehiscent cotton anther, and the  
670 gray box marks a dehiscent cotton anther. **c**, The pink box marks an indehiscent cotton

671 anther, and the green box marks a dehiscent cotton anther. **d**, The gray box marks an  
672 indehiscent cotton anther, and the red box marks a dehiscent cotton anther. In each  
673 test, the colors of the prediction boxes with different labels were randomly generated.

#### 674 **Figure 4: Comparison of different models**

675 **a**, Comparison of YOLOv5 and Faster R-CNN. YOLOv5 model has higher  
676 recognition speed, Faster R-CNN model has higher detection accuracy.

677 **b**, Comparison of with or without FPN (Feature Pyramid Networks)

678 The  $mAP@0.5:0.95$  of the improved model increased by 0.002,  $R^2$  of "close" class  
679 increased by 0.003, and  $R^2$  of "open" class and "all" decreased slightly.

680 **c**, Comparison of with or without data augmentation. The improved model has a slight  
681 decline in the number of  $R^2$  in the open category and an improvement in other  
682 evaluation indicators.

683 **d**, Comparison of with or without data Multi-Scale

684 The result showed the  $mAP@0.5:0.95$  of model was improved by 0.003 after  
685 Multi-Scale training.  $R^2$  in the "open" and "close" categories fell by 0.0092 and  
686 0.0007, respectively.  $R^2$  in the "all" category went up 0.0086. "open" and "close"  
687 represent dehiscent and indehiscent anther, respectively.

#### 688 **Figure 5: $mAP@0.5:0.95$ curves and LOSS curves**

689 **Model 1** is the Faster R-CNN with FPN structure. **Model 2** is the Faster R-CNN with  
690 data augmentation and FPN structure. **Model 3** is the traditional Faster R-CNN.

691 **Model 4** is the Faster R-CNN with Multi-Scale and data augmentation and FPN

692 structure. **Epoch**: All the data were sent into the network to complete a process of  
693 forward calculation and back propagation.  **$mAP@0.5:0.95$**  is the process of  
694 increasing IoU from 0.5 to 0.95 according to the span of 0.05. The mAP  
695 corresponding to each IoU was added to obtain the average value of mAP in this  
696 process.

#### 697 **Figure 6: Data acquisition**

698 **a**, The image dataset captures the platform scene. **b**, Image of cotton anther. **c**, The  
699 surface of dehiscent cotton anther (open) is rough from the image. **d**, The surface of  
700 indehiscent cotton anther (close) is smooth from the image.

701

702 **Table 1: Screening of HT tolerant cotton germplasms using integrated Faster**

703 **R-CNN model**

704 Open: the average number of dehiscence anthers from different flowers,  $n > 4$ ; Close: the

705 average number of indehiscent anthers from different flowers,  $n > 4$ ; Dehiscence rate:

706 the number of dehiscence anthers of each flower / (the number of dehiscence anthers of

707 each flower + the number of indehiscent anthers of each flower),  $n > 4$ .

## Parsed Citations

- Barre P, Stover BC, Muller KF, Steinhage V (2017) LeafNet: A computer vision system for automatic plant species identification. *Ecological Informatics* 40: 50-56**  
Google Scholar: [Author Only](#) [Title Only](#) [Author and Title](#)
- Bodla N, Singh B, Chellappa R, Davis LS (2017) Soft-NMS: improving object detection with one line of code. 2017 IEEE International Conference on Computer Vision (ICCV): 5562-5570**  
Google Scholar: [Author Only](#) [Title Only](#) [Author and Title](#)
- Ferentinos KP (2018) Deep learning models for plant disease detection and diagnosis. *Computers and Electronics in Agriculture* 145: 311-318**  
Google Scholar: [Author Only](#) [Title Only](#) [Author and Title](#)
- Fuentes A, Yoon S, Kim SC, Park DSJS (2017) A robust deep-learning-based detector for real-time tomato plant diseases and pests recognition. 17: 153**  
Google Scholar: [Author Only](#) [Title Only](#) [Author and Title](#)
- Genze N, Bharti R, Grieb M, Schultheiss SJ, Grimm DGJPM (2020) Accurate machine learning-based germination detection, prediction and quality assessment of three grain crops. 16: 1-11**  
Google Scholar: [Author Only](#) [Title Only](#) [Author and Title](#)
- Girshick R, Donahue J, Darrell T, Malik J (2014) Rich feature hierarchies for accurate object detection and semantic segmentation. In *Proceedings of the IEEE conference on computer vision and pattern recognition*, pp 580-587**  
Google Scholar: [Author Only](#) [Title Only](#) [Author and Title](#)
- Gutierrez A, Ansuategi A, Susperregi L, Tubio C, Rankic I, Lenza L (2019) A benchmarking of learning strategies for pest detection and identification on tomato plants for autonomous scouting robots using internal databases. *Journal of Sensors* 2019**  
Google Scholar: [Author Only](#) [Title Only](#) [Author and Title](#)
- Howard AG, Zhu M, Chen B, Kalenichenko D, Wang W, Weyand T, Andreetto M, Adam HJapa (2017) Mobilenets: efficient convolutional neural networks for mobile vision applications. arXiv: 1704.04861**  
Google Scholar: [Author Only](#) [Title Only](#) [Author and Title](#)
- Kim SG, Lee S, Kim YS, Yun DJ, Woo JC, Park CM (2010) Activation tagging of an Arabidopsis SHI-RELATED SEQUENCE gene produces abnormal anther dehiscence and floral development. *Plant Molecular Biology* 74: 337-351**  
Google Scholar: [Author Only](#) [Title Only](#) [Author and Title](#)
- Liu J, Wang XW (2021) Early recognition of tomato gray leaf spot disease based on MobileNetV2-YOLOv3 model (vol 16, 83, 2020). *Plant Methods* 17: 16**  
Google Scholar: [Author Only](#) [Title Only](#) [Author and Title](#)
- Liu W, Anguelov D, Erhan D, Szegedy C, Reed S, Fu CY, Berg AC (2016) SSD: single shot multiBox detector. *Computer Vision - ECCV 2016, Pt I* 9905: 21-37**  
Google Scholar: [Author Only](#) [Title Only](#) [Author and Title](#)
- Ma YZ, Min L, Wang MJ, Wang CZ, Zhao YL, Li YY, Fang QD, Wu YL, Xie S, Ding YH, Su XJ, Hu Q, Zhang QH, Li XY, Zhang XL (2018) Disrupted genome methylation in response to high temperature has distinct effects on microspore abortion and anther indehiscence. *Plant Cell* 30: 1387-1403**  
Google Scholar: [Author Only](#) [Title Only](#) [Author and Title](#)
- Min L, Li YY, Hu Q, Zhu LF, Gao WH, Wu YL, Ding YH, Liu SM, Yang XY, Zhang XL (2014) Sugar and auxin signaling pathways respond to High-Temperature stress during anther development as revealed by transcript profiling analysis in cotton. *Plant Physiology* 164: 1293-1308**  
Google Scholar: [Author Only](#) [Title Only](#) [Author and Title](#)
- Montesinos-López OA, Montesinos-López A, Tuberosa R, Maccaferri M, Sciara G, Ammar K, Crossa JFiPS (2019) Multi-trait, multi-environment genomic prediction of durum wheat with genomic best linear unbiased predictor and deep learning methods. 10: 1311**  
Google Scholar: [Author Only](#) [Title Only](#) [Author and Title](#)
- Pang L, Liu H, Chen Y, Miao JG (2020) Real-time concealed object detection from passive millimeter wave images based on the YOLOv3 algorithm. *Sensors* 20: 1678**  
Google Scholar: [Author Only](#) [Title Only](#) [Author and Title](#)
- Pang L, Men S, Yan L, Xiao J (2020) Rapid vitality estimation and prediction of corn seeds based on spectra and images using deep learning and hyperspectral imaging techniques. *IEEE Access* 8: 123026-123036**  
Google Scholar: [Author Only](#) [Title Only](#) [Author and Title](#)
- Peet M, Sato S, Gardner R (1998) Comparing heat stress effects on male-fertile and male-sterile tomatoes. *Plant Cell* 21: 225-231**  
Google Scholar: [Author Only](#) [Title Only](#) [Author and Title](#)
- Piccialli V, Sciandrone M (2018) Nonlinear optimization and support vector machines. *4or-a Quarterly Journal of Operations Research* 16: 111-149**

Google Scholar: [Author Only](#) [Title Only](#) [Author and Title](#)

**Redmon J, Divvala S, Girshick R, Farhadi A (2016) You Only Look Once: unified, real-Time object detection. 2016 IEEE Conference on Computer Vision and Pattern Recognition (Cvpr): 779-788**

Google Scholar: [Author Only](#) [Title Only](#) [Author and Title](#)

**Redmon J, Farhadi A (2017) YOLO9000: Better, Faster, Stronger. 30th IEEE Conference on Computer Vision and Pattern Recognition (Cvpr 2017): 6517-6525**

Google Scholar: [Author Only](#) [Title Only](#) [Author and Title](#)

**Redmon J, Farhadi A (2018) Yolov3: An incremental improvement. arXiv preprint arXiv: 02767**

Google Scholar: [Author Only](#) [Title Only](#) [Author and Title](#)

**Ren SQ, He KM, Girshick R, Sun J (2017) Faster R-CNN: Towards real-time object detection with region proposal networks. IEEE Transactions on Pattern Analysis and Machine Intelligence 39: 1137-1149**

Google Scholar: [Author Only](#) [Title Only](#) [Author and Title](#)

**Samiei S, Rasti P, Vu JL, Buitink J, Rousseau D (2020) Deep learning-based detection of seedling development. Plant Methods 16: 11**

Google Scholar: [Author Only](#) [Title Only](#) [Author and Title](#)

**Sanders PM, Bui AQ, Weterings K, McIntire KN, Hsu YC, Lee PY, Truong MT, Beals TP, Goldberg RB (1999) Anther developmental defects in Arabidopsis thaliana male-sterile mutants. Sexual Plant Reproduction 11: 297-322**

Google Scholar: [Author Only](#) [Title Only](#) [Author and Title](#)

**Schmidhuber J (2015) Deep learning in neural networks: An overview. Neural Networks 61: 85-117**

Google Scholar: [Author Only](#) [Title Only](#) [Author and Title](#)

**Siraj A, Lim DY, Tayara H, Chong KT (2021) UbiComb: A hybrid deep learning model for predicting plant-specific protein ubiquitylation sites. Genes 12: 717**

Google Scholar: [Author Only](#) [Title Only](#) [Author and Title](#)

**Ubbens JR, Stavness I (2017) Deep Plant Phenomics: A deep learning platform for complex plant phenotyping tasks. Frontiers in Plant Science 8: 1190**

Google Scholar: [Author Only](#) [Title Only](#) [Author and Title](#)

**Wekesa JS, Meng J, Luan YS (2020) Multi-feature fusion for deep learning to predict plant lncRNA-protein interaction. Genomics 112: 2928-2936**

Google Scholar: [Author Only](#) [Title Only](#) [Author and Title](#)

**Xu ZF, Jia RS, Sun HM, Liu QM, Cui Z (2020) Light-YOLOv3: fast method for detecting green mangoes in complex scenes using picking robots. Applied Intelligence 50: 4670-4687**

Google Scholar: [Author Only](#) [Title Only](#) [Author and Title](#)

**Yang CY, Xu ZY, Song J, Conner K, Barrera GV, Wilson ZA (2007) Arabidopsis MYB26/MALE STERILE35 regulates secondary thickening in the endothecium and is essential for anther dehiscence. Plant Cell 19: 534-548**

Google Scholar: [Author Only](#) [Title Only](#) [Author and Title](#)

**Yang ZF, Gao S, Xiao F, Li GH, Ding YF, Guo QH, Paul MJ, Liu ZH (2020) Leaf to panicle ratio (LPR): a new physiological trait indicative of source and sink relation in japonica rice based on deep learning. Plant Methods 16: 15**

Google Scholar: [Author Only](#) [Title Only](#) [Author and Title](#)

**Yun S, Han D, Oh SJ, Chun S, Choe J, Yoo Y (2019) CutMix: Regularization strategy to train strong classifiers with localizable features. 2019 IEEE/CVF International Conference on Computer Vision (ICCV 2019): 6022-6031**

Google Scholar: [Author Only](#) [Title Only](#) [Author and Title](#)

**Zhu JM, Zhang GP, Zhou SB, Li K (2021) Relation-aware Siamese region proposal network for visual object tracking. Multimedia Tools and Applications 80: 15469-15485**

Google Scholar: [Author Only](#) [Title Only](#) [Author and Title](#)
